# Supplementary figures and images for: Sculpting ion channel functional expression with engineered ubiquitin ligases
Source: eLife journal article supplement (doi:10.7554/elife.29744), 2017-12-18

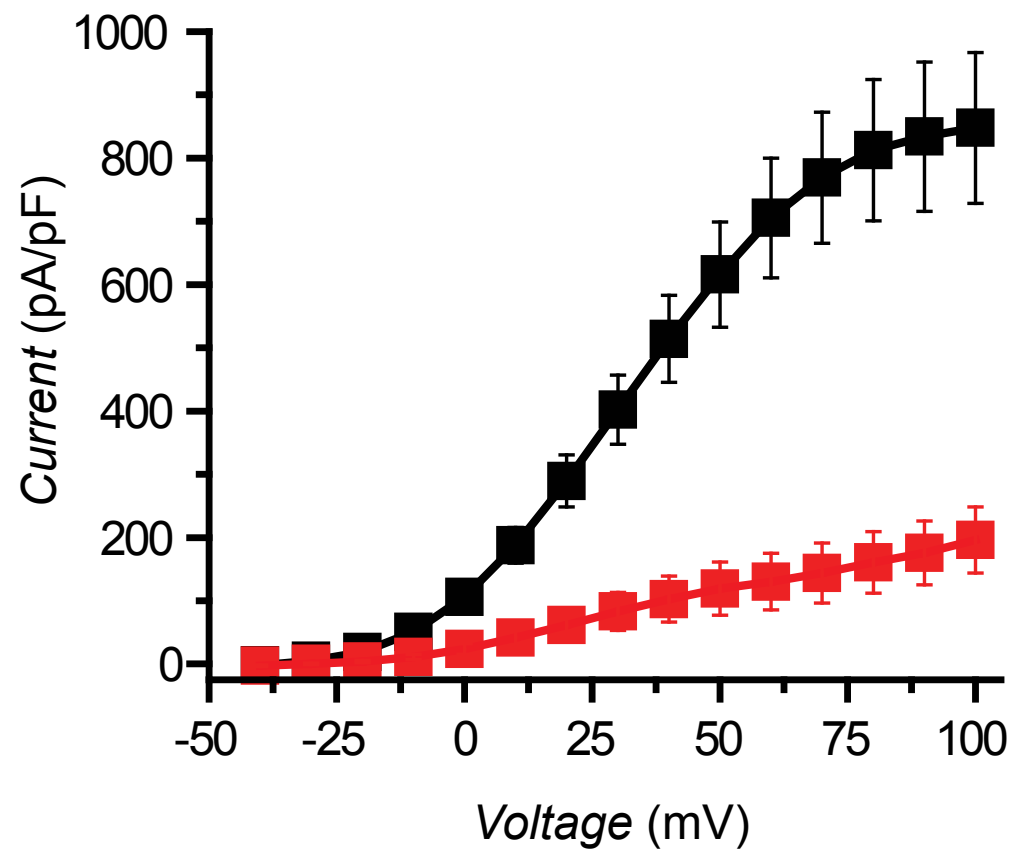

Supplement: supp [file elife-29744-supp-v1.zip]

**A**

BBS-Q1-YFP

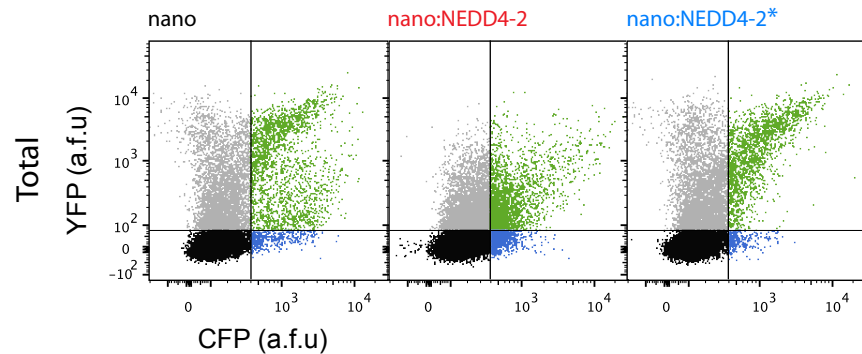**B**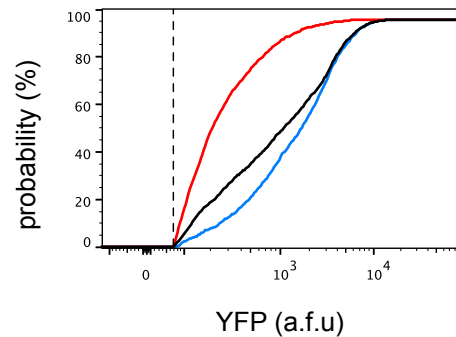**C**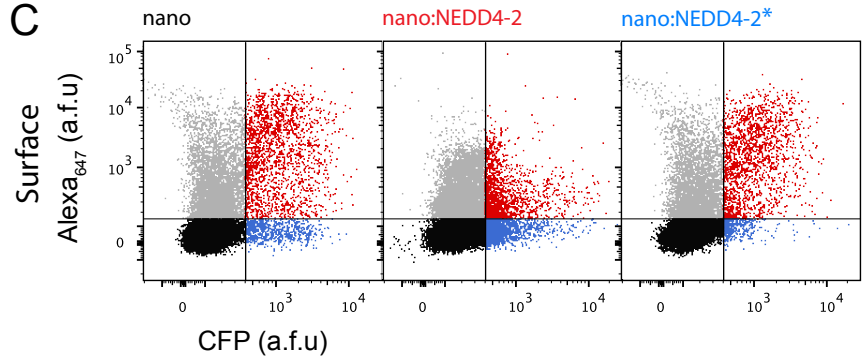**D**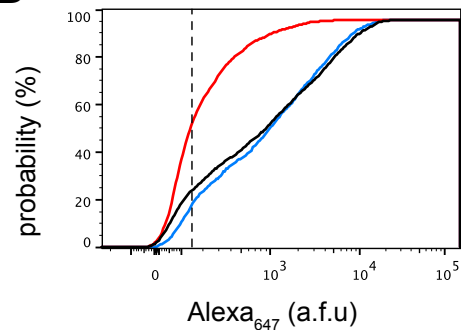

Supplement: supp [file elife-29744-supp-v1.zip]

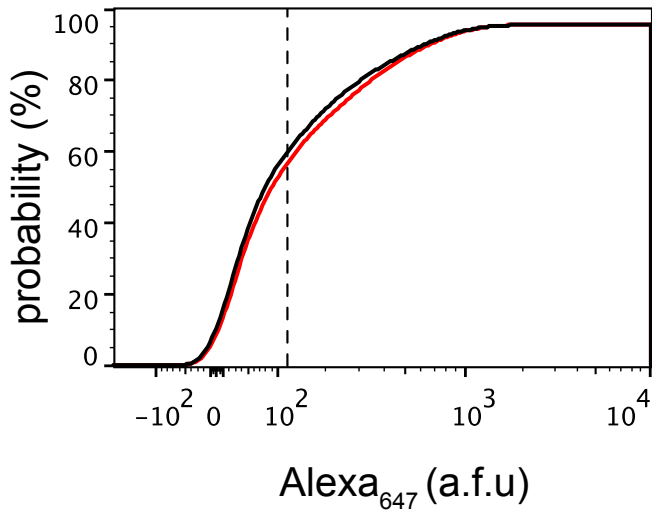

Supplement: supp [file elife-29744-supp-v1.zip]

**A**

BBS-Q1-YFP

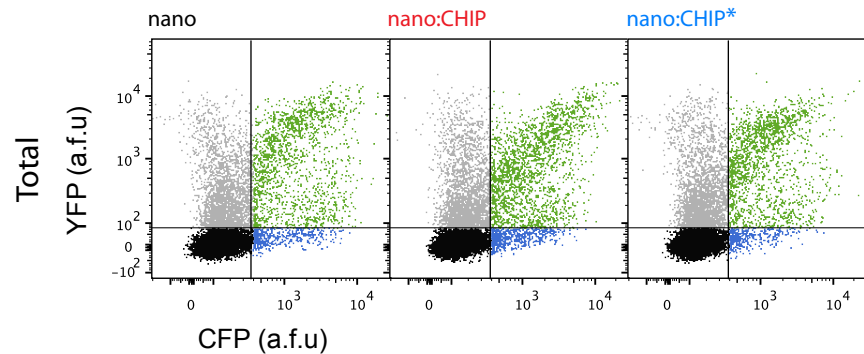**B**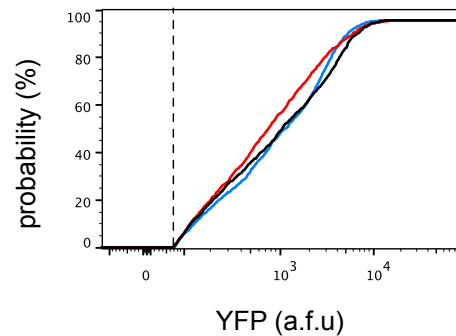**C**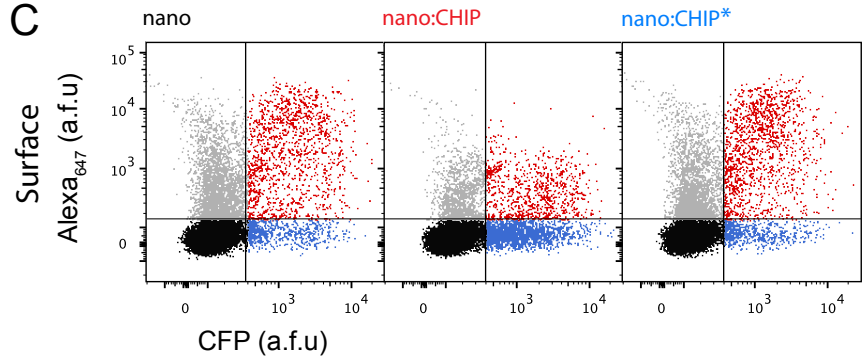**D**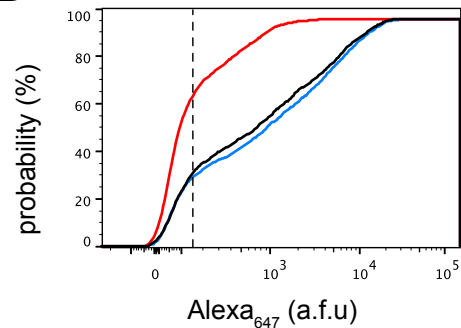

Supplement: supp [file elife-29744-supp-v1.zip]

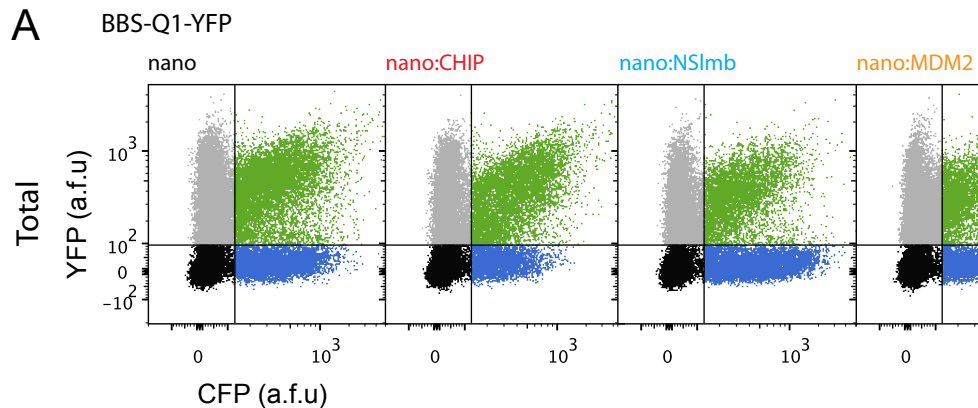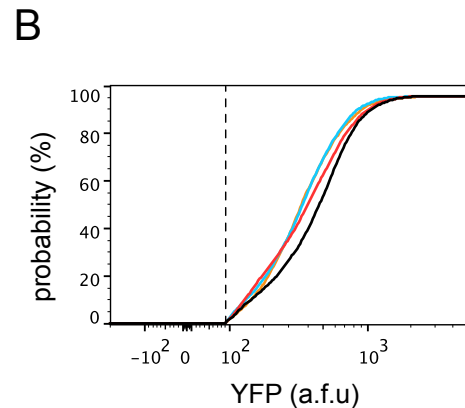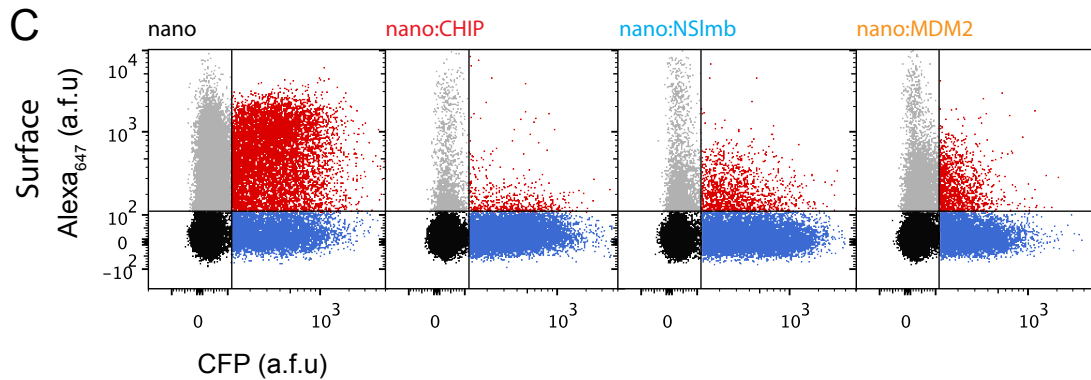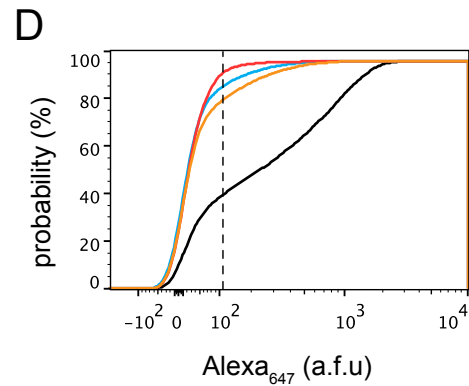

Supplement: supp [file elife-29744-supp-v1.zip]

A

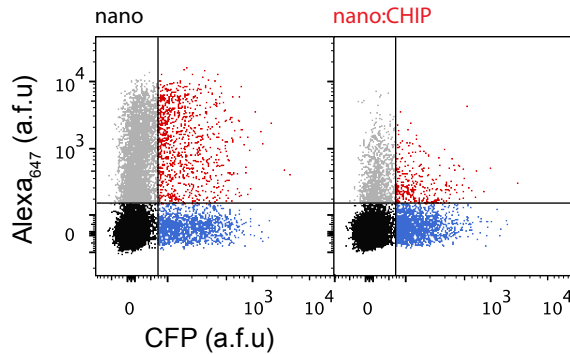

B

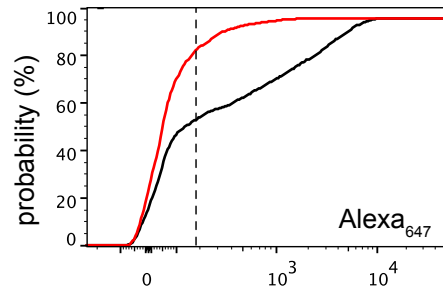

C

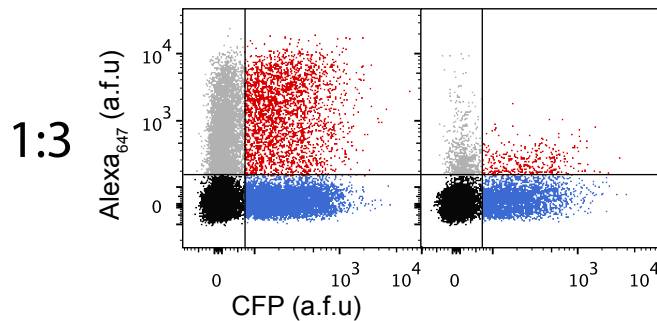

D

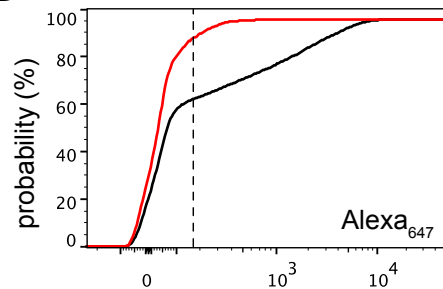

E

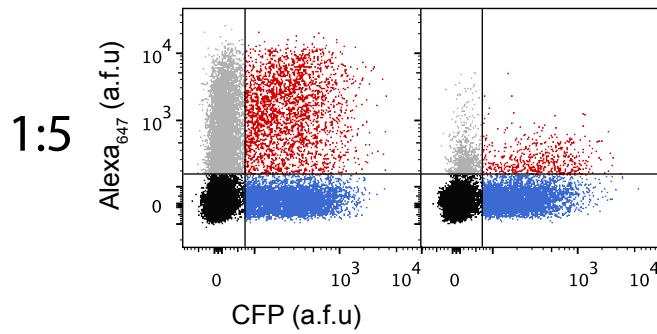

F

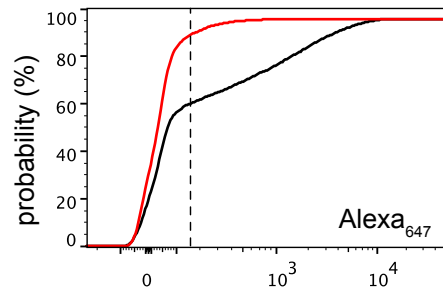

Supplement: supp [file elife-29744-supp-v1.zip]

**A**

BBS-Q1-YFP

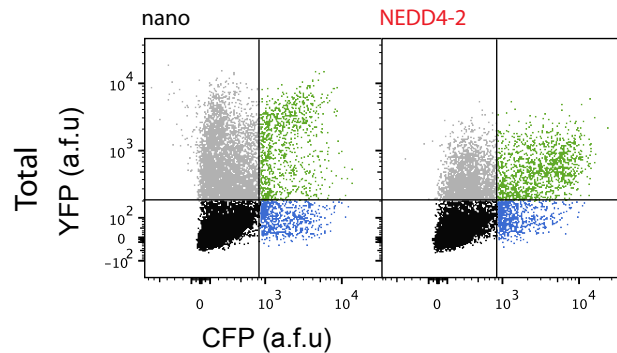**B**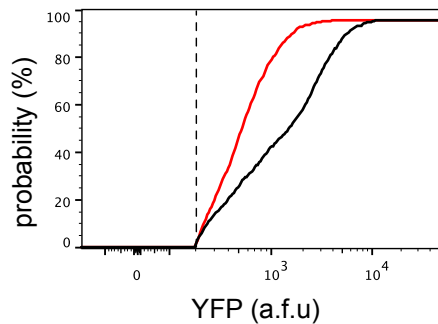**C**

BBS-Q1-YFP

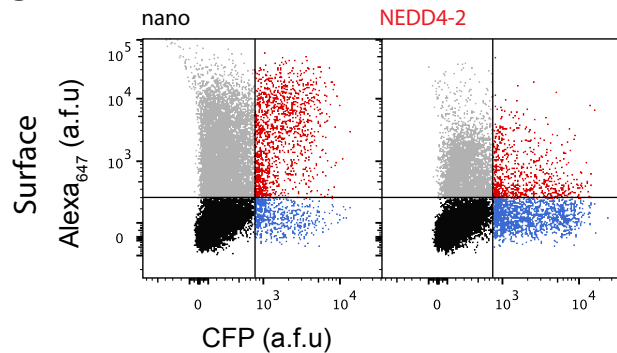**D**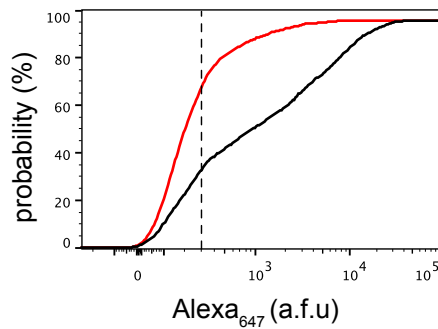

Supplement: supp [file elife-29744-supp-v1.zip]

**A****BBS-Q1-YFP + E1**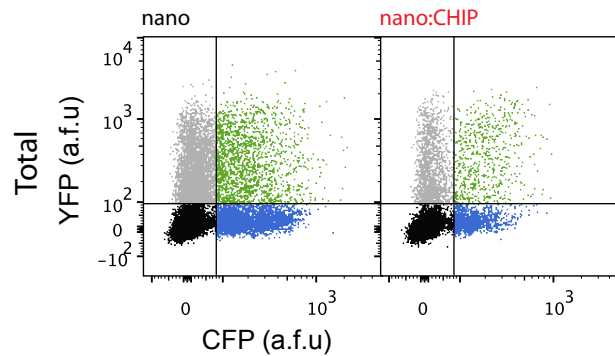**B**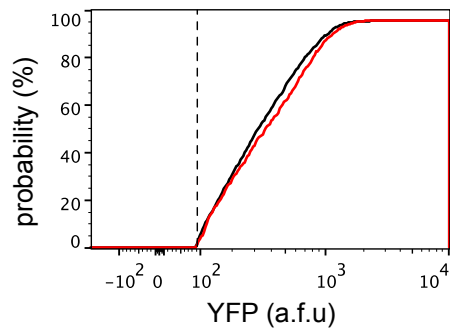**C****BBS-Q1 + E1-YFP**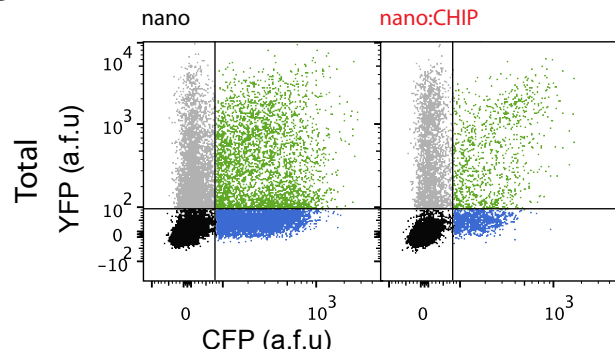**D**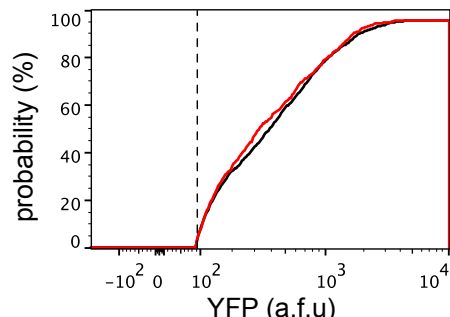

Supplement: supp [file elife-29744-supp-v1.zip]
